# Supplementary material for: The global cardiovascular magnetic resonance registry (GCMR) of the society for cardiovascular magnetic resonance (SCMR): its goals, rationale, data infrastructure, and current developments
Source: Springer Nature journal article supplement (doi:10.1186/s12968-016-0321-7), 2016-12-01
Supplement: MOESM1 [file 12058944]

**Additional file 1: Table S1: GCMR Steering Committee Members:**

| <b>GCMR Steering Committee Members</b> |             |                   |                 |
|----------------------------------------|-------------|-------------------|-----------------|
| <b>Name</b>                            | <b>Role</b> | <b>Occupation</b> | <b>Location</b> |
| Raymond Kwong                          | Chair       | Cardiologist      | United States   |
| Erik Schelbert                         | Vice-Chair  | Cardiologist      | United States   |
| Uma Valeti                             | Coordinator | Cardiologist      | United States   |
| Subha Raman                            | Member      | Cardiologist      | United States   |
| Steffen Petersen                       | Member      | Cardiologist      | United Kingdom  |
| Scott Flamm                            | Member      | Radiologist       | United States   |
| Ted Martin                             | Member      | Cardiologist      | United States   |
| Alistair Young                         | Member      | Scientist         | New Zealand     |
| Ricardo Cury                           | Member      | Radiologist       | United States   |
