# Supplementary material for: The global cardiovascular magnetic resonance registry (GCMR) of the society for cardiovascular magnetic resonance (SCMR): its goals, rationale, data infrastructure, and current developments
Source: Springer Nature journal article supplement (doi:10.1186/s12968-016-0321-7), 2016-12-01
Supplement: MOESM3 [file 12058944]

# Additional file 3: Figure S1

## CMR Cooperative web database: User Access Management

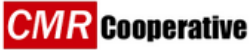

### User Name

|                   |           |                  |       |                   |  |                    |  |
|-------------------|-----------|------------------|-------|-------------------|--|--------------------|--|
| <b>First Name</b> | Testsite1 | <b>Last Name</b> | User1 | <b>NPI Number</b> |  | <b>Employee ID</b> |  |
|-------------------|-----------|------------------|-------|-------------------|--|--------------------|--|

### User Details

|                         |                |                       |                              |                  |              |
|-------------------------|----------------|-----------------------|------------------------------|------------------|--------------|
| <b>Username</b>         | testsite1user1 | <b>Academic Title</b> |                              | <b>Phone</b>     | 222-222-2222 |
| <b>Password</b>         |                | <b>Hospital Title</b> |                              | <b>Fax</b>       |              |
| <b>Confirm Password</b> |                | <b>Email</b>          | testsite1user1@cmrcenter.org | <b>Home page</b> |              |

### Offices

| Address                            | City | State | Zip | Phone | Fax | Fax2 |
|------------------------------------|------|-------|-----|-------|-----|------|
| <input type="button" value="Add"/> |      |       |     |       |     |      |

### User Roles

|                               |                                                                |
|-------------------------------|----------------------------------------------------------------|
| <b>CMR User</b>               | <input checked="" type="checkbox"/>                            |
| <b>CMR Admin</b>              | <input checked="" type="checkbox"/>                            |
| <b>Primary Care Physician</b> | <input checked="" type="checkbox"/>                            |
| <b>Referring Physician</b>    | <input checked="" type="checkbox"/>                            |
| <b>Technologist</b>           | <input type="checkbox"/>                                       |
| <b>Coordinator</b>            | <input type="checkbox"/>                                       |
| <b>Fellow</b>                 | <input type="checkbox"/>                                       |
| <b>Attending</b>              | <input checked="" type="checkbox"/>                            |
| <b>Consultant Radiologist</b> | <input type="checkbox"/>                                       |
| <b>Read Only</b>              | <input type="checkbox"/>                                       |
| <b>View Report Only</b>       | <input type="checkbox"/>                                       |
| <b>Start Date</b>             | <input type="text"/> <input type="text"/> <input type="text"/> |
| <b>End Date</b>               | <input type="text"/> <input type="text"/> <input type="text"/> |

### Status

Active

### Notes
