# Supplementary material for: The global cardiovascular magnetic resonance registry (GCMR) of the society for cardiovascular magnetic resonance (SCMR): its goals, rationale, data infrastructure, and current developments
Source: Springer Nature journal article supplement (doi:10.1186/s12968-016-0321-7), 2016-12-01
Supplement: MOESM5 [file 12058944]

# Additional file 5: Figure S3

## CMR Cooperative web database: Medications

**CMR Cooperative**

Status Panel

Choose Patient Patient ID: 585 Name: Doe, John Sex: Male DOB: Dec 31, 1968 MRN: 11111111 Edit

Choose Study MRI Study ID: 607 MRI Accession #: 0 MRI Date: Jan 11, 2005 Patient Age: 36 yrs

**CMR Coop Essential**

**Patient Info**

**Cardiac History**

MRI Medications

|                                          | Yes                              | No                               | Unknown                          | Brand Name | Generic Name | Dose | Route | Frequency | Duration      | Comments                        |
|------------------------------------------|----------------------------------|----------------------------------|----------------------------------|------------|--------------|------|-------|-----------|---------------|---------------------------------|
| <b>Beta-Blockers</b>                     | <input checked="" type="radio"/> | <input type="radio"/>            | <input type="radio"/>            |            |              |      |       |           | 1 - 5 Years   |                                 |
| <b>Medications</b>                       |                                  |                                  |                                  |            |              |      |       |           |               |                                 |
| <b>Digoxin</b>                           | <input checked="" type="radio"/> | <input type="radio"/>            | <input type="radio"/>            | Lanoxin    | Digoxin      |      | PO    |           | 1 - 6 Months  |                                 |
| <b>Labs and Asso. Tests</b>              |                                  |                                  |                                  |            |              |      |       |           |               |                                 |
| <b>Calcium Channel Blockers</b>          | <input checked="" type="radio"/> | <input type="radio"/>            | <input type="radio"/>            |            |              |      |       |           | > 5 Years     |                                 |
| <b>Drugs and Drug Protocols</b>          |                                  |                                  |                                  |            |              |      |       |           |               |                                 |
| <b>ACE Inhibitors</b>                    | <input checked="" type="radio"/> | <input type="radio"/>            | <input type="radio"/>            | Prinivil   | Lisinopri    |      | PO    |           | > 5 Years     |                                 |
| <b>MRI Technique</b>                     |                                  |                                  |                                  |            |              |      |       |           |               |                                 |
| <b>Angiotensin Receptor Blocker</b>      | <input type="radio"/>            | <input checked="" type="radio"/> | <input type="radio"/>            |            |              |      |       |           |               |                                 |
| <b>Aldosterone Receptor Blocker</b>      | <input type="radio"/>            | <input type="radio"/>            | <input type="radio"/>            |            |              |      |       |           |               |                                 |
| <b>Resting MRI</b>                       |                                  |                                  |                                  |            |              |      |       |           |               |                                 |
| <b>Neprilysin Inhibitor/ARB</b>          | <input type="radio"/>            | <input type="radio"/>            | <input type="radio"/>            |            |              |      |       |           |               |                                 |
| <b>Hemo Response</b>                     |                                  |                                  |                                  |            |              |      |       |           |               |                                 |
| <b>Alpha-1 Blocker</b>                   | <input type="radio"/>            | <input type="radio"/>            | <input type="radio"/>            |            |              |      |       |           |               |                                 |
| <b>Alpha-2 Agonist</b>                   | <input type="radio"/>            | <input type="radio"/>            | <input type="radio"/>            |            |              |      |       |           |               |                                 |
| <b>Grade Myocardial Segments</b>         |                                  |                                  |                                  |            |              |      |       |           |               |                                 |
| <b>Direct Vasodilators</b>               | <input type="radio"/>            | <input type="radio"/>            | <input type="radio"/>            |            |              |      |       |           |               |                                 |
| <b>Endothelin Receptor Antagonist</b>    | <input type="radio"/>            | <input type="radio"/>            | <input type="radio"/>            |            |              |      |       |           |               |                                 |
| <b>T1 Mapping</b>                        |                                  |                                  |                                  |            |              |      |       |           |               |                                 |
| <b>Positive Inotropes</b>                | <input type="radio"/>            | <input type="radio"/>            | <input type="radio"/>            |            |              |      |       |           |               |                                 |
| <b>Oral Nitrates</b>                     | <input checked="" type="radio"/> | <input type="radio"/>            | <input type="radio"/>            |            |              |      |       |           | 7 - 12 Months |                                 |
| <b>Pericardium and Pleura</b>            |                                  |                                  |                                  |            |              |      |       |           |               |                                 |
| <b>Other Nitroglycerin</b>               | <input type="radio"/>            | <input type="radio"/>            | <input type="radio"/>            |            |              |      |       |           |               |                                 |
| <b>Heart Valves</b>                      |                                  |                                  |                                  |            |              |      |       |           |               |                                 |
| <b>Statins</b>                           | <input type="radio"/>            | <input checked="" type="radio"/> | <input type="radio"/>            |            |              |      |       |           |               |                                 |
| <b>Non-statin lipid agents</b>           | <input checked="" type="radio"/> | <input type="radio"/>            | <input type="radio"/>            |            |              |      |       |           | 1 - 6 Months  |                                 |
| <b>Thoracic Aorta</b>                    |                                  |                                  |                                  |            |              |      |       |           |               |                                 |
| <b>Diuretics</b>                         | <input type="radio"/>            | <input checked="" type="radio"/> | <input type="radio"/>            |            |              |      |       |           | 7 - 12 Months |                                 |
| <b>Non-cardiac Findings</b>              |                                  |                                  |                                  |            |              |      |       |           |               |                                 |
| <b>ASA</b>                               | <input checked="" type="radio"/> | <input type="radio"/>            | <input type="radio"/>            |            |              |      |       |           | 1 - 5 Years   |                                 |
| <b>Antiplatelets</b>                     | <input type="radio"/>            | <input type="radio"/>            | <input type="radio"/>            |            |              |      |       |           |               |                                 |
| <b>Complications</b>                     |                                  |                                  |                                  |            |              |      |       |           |               |                                 |
| <b>Anticoagulants</b>                    | <input type="radio"/>            | <input checked="" type="radio"/> | <input type="radio"/>            |            |              |      |       |           |               |                                 |
| <b>Antiarrhythmics</b>                   | <input type="radio"/>            | <input type="radio"/>            | <input checked="" type="radio"/> |            |              |      |       |           |               |                                 |
| <b>Diagnostic / Therapeutic Decision</b> |                                  |                                  |                                  |            |              |      |       |           |               |                                 |
| <b>Insulin</b>                           | <input checked="" type="radio"/> | <input type="radio"/>            | <input type="radio"/>            |            |              |      |       |           |               |                                 |
| <b>Hypoglycemic Agent</b>                | <input type="radio"/>            | <input type="radio"/>            | <input checked="" type="radio"/> |            |              |      |       |           |               |                                 |
| <b>Other Medication</b>                  | <input type="radio"/>            | <input type="radio"/>            | <input type="radio"/>            |            |              |      |       |           |               | Delete <input type="checkbox"/> |
