# Supplementary material for: The global cardiovascular magnetic resonance registry (GCMR) of the society for cardiovascular magnetic resonance (SCMR): its goals, rationale, data infrastructure, and current developments
Source: Springer Nature journal article supplement (doi:10.1186/s12968-016-0321-7), 2016-12-01
Supplement: MOESM6 [file 12058944]

# Additional file 6: Figure S4

## CMR Cooperative web database: Quantitative CMR Data

CMR

Cooperative

Status Panel

CMR Coop Extended

Choose Patient
Patient ID: 585
Name: Doe, John

Choose Study
MRI Study ID: 607
MRI Accession #: 0

- Patient Info
- Cardiac History
- Medications
- Labo and Assoc. Tests
- Drugs and Drug Protocols
- MRI Technique
- Raising MRI
- Hemo Response
- Grade Myocardial Segments
- T1 Mapping
- Pericardium and Pleura
- Heart Valves
- Thoracic Aorta
- Non-cardiac Findings
- Complications
- Diagnostic / Therapeutic Decision
- Generate MRI Report

Left Ventricle
Right Ventricle
Atria
Great Vessels

Left Ventricle

Cine not acquired:  Raw      Corrected      Indexed

Cannot quantify:       Slice thn: 8.0 mm      BSA: 1.7 m<sup>2</sup>

Skip: 0.0 mm

Rest BP: 120.0 / 80.0      Already Corrected:

|                               |                       |            |                           |
|-------------------------------|-----------------------|------------|---------------------------|
| <b>LVEDV:</b>                 | 200.0 ml              | 200.0 ml   | 117.85 ml/m <sup>2</sup>  |
| <b>LVESV:</b>                 | 40.0 ml               | 40.0 ml    | 23.53 ml/m <sup>2</sup>   |
| <b>LVSV:</b>                  | 160.0 ml              | 160.0 ml   | 94.12 ml/m <sup>2</sup>   |
| <b>LVEF:</b>                  | 80.0 %                |            |                           |
| <b>rest HR:</b> 80.0          | <b>CO:</b> 12.8 l/min | 12.8 l/min | 7.53 l/min/m <sup>2</sup> |
| <b>LVED Mass:</b>             | 250.0 g               | 250.0 g    | 147.06 g/m <sup>2</sup>   |
| <b>LVES Mass:</b>             | 0.0 g                 | 0.0 g      | 0.0 g/m <sup>2</sup>      |
| <b>LV averaged mass:</b>      | 0.0 g                 | 0.0 g      | 0.0 g/m <sup>2</sup>      |
| <b>LVEDD1:</b>                | 50.0 mm               |            | 29.41 mm/m <sup>2</sup>   |
| <b>LVEDD2:</b>                | 0.0 mm                |            | 0.0 mm/m <sup>2</sup>     |
| <b>LVESD1:</b>                | 40.0 mm               |            | 23.53 mm/m <sup>2</sup>   |
| <b>LVESD2:</b>                | 0.0 mm                |            | 0.0 mm/m <sup>2</sup>     |
| <b>Fractional Shortening:</b> | 0.0 %                 |            |                           |
| <b>AS:</b>                    | 10.0 mm               |            |                           |
| <b>PL:</b>                    | 10.0 mm               |            |                           |
| <b>Max Wall Thickness:</b>    | 0.0 mm                |            |                           |
| <b>EpiLVEDV:</b>              | 0.0 ml                | 0.0 ml     | 0.0 ml/m <sup>2</sup>     |
| <b>LVED mass calculated:</b>  | 0.0 g                 | 0.0 g      | 0.0 g/m <sup>2</sup>      |
| <b>LVEDL:</b>                 | 0.0 mm                |            | 0.0 mm/m <sup>2</sup>     |
| <b>LVESL:</b>                 | 0.0 mm                |            | 0.0 mm/m <sup>2</sup>     |
| <b>T2* heart:</b>             | 0.0 msec              |            |                           |
| <b>T2* liver:</b>             | 0.0 msec              |            |                           |

Left Ventricle
Right Ventricle
Atria
Great Vessels

Right Ventricle

Cine not acquired:  Raw      Corrected      Indexed

Cannot quantify:       Slice thn: 8.0 mm      BSA: 1.7 m<sup>2</sup>

Skip: 0.0 mm

Already Corrected:

|                            |                     |          |                                     |
|----------------------------|---------------------|----------|-------------------------------------|
| <b>RVEDV:</b>              | 180.0 ml            | 180.0 ml | 105.88 ml/m <sup>2</sup>            |
| <b>RVESV:</b>              | 180.0 ml            | 160.0 ml | 94.12 ml/m <sup>2</sup>             |
| <b>RVSV:</b>               | 20.0 ml             | 20.0 ml  | 11.76 ml/m <sup>2</sup>             |
| <b>RVEF:</b>               | 11.11 %             |          |                                     |
| <b>RV Regional Fn:</b>     | Abnormal            |          |                                     |
| <b>RVED Mass:</b>          | 200.0 g             | 200.0 g  | 117.65 g/m <sup>2</sup>             |
| <b>RV Wall Thickness:</b>  | 0.0 mm              |          |                                     |
| <b>RV ED Area:</b>         | 0.0 mm <sup>2</sup> |          | 0.0 mm <sup>2</sup> /m <sup>2</sup> |
| <b>RV ES Area:</b>         | 0.0 mm <sup>2</sup> |          | 0.0 mm <sup>2</sup> /m <sup>2</sup> |
| <b>RVEDD1:</b>             | 0.0 mm              |          | 0.0 mm/m <sup>2</sup>               |
| <b>RVEDD2:</b>             | 0.0 mm              |          | 0.0 mm/m <sup>2</sup>               |
| <b>RVESD1:</b>             | 0.0 mm              |          | 0.0 mm/m <sup>2</sup>               |
| <b>RVESD2:</b>             | 0.0 mm              |          | 0.0 mm/m <sup>2</sup>               |
| <b>EpiRVEDV:</b>           | 0.0 ml              | 0.0 ml   | 0.0 ml/m <sup>2</sup>               |
| <b>RV mass calculated:</b> | 0.0 g               | 0.0 g    | 0.0 g/m <sup>2</sup>                |
| <b>RVEDL:</b>              | 0.0 mm              |          | 0.0 mm/m <sup>2</sup>               |
| <b>RVESL:</b>              | 0.0 mm              |          | 0.0 mm/m <sup>2</sup>               |
