# Supplementary material for: The global cardiovascular magnetic resonance registry (GCMR) of the society for cardiovascular magnetic resonance (SCMR): its goals, rationale, data infrastructure, and current developments
Source: Springer Nature journal article supplement (doi:10.1186/s12968-016-0321-7), 2016-12-01
Supplement: MOESM7 [file 12058944]

# Additional file 7: Figure S5

## CMR Cooperative web database: Clinical Outcomes

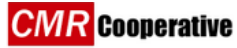

Choose Patient Patient ID: 585 Name: Doe, John Sex: Male DOB: Dec 31, 1968 MRN: 11111111 [Edit](#)  
Choose Study Not Selected

### Outcome

Date of contact:    Contacted by:  Medical Record Only  [Add](#)  
Date of Last Medical Record Review:

### Outcome Details

|                                                                                  | Month                                       | Day                               | Year                              |                                 |                     |
|----------------------------------------------------------------------------------|---------------------------------------------|-----------------------------------|-----------------------------------|---------------------------------|---------------------|
| Unstable Angina: <input checked="" type="radio"/> Yes <input type="radio"/> No   | Date: <input type="text" value="January"/>  | <input type="text" value="3"/>    | <input type="text" value="2002"/> | Delete <input type="checkbox"/> | <a href="#">Add</a> |
| Acute MI: <input checked="" type="radio"/> Yes <input type="radio"/> No          | Date: <input type="text" value="February"/> | <input type="text" value="3"/>    | <input type="text" value="2003"/> | Delete <input type="checkbox"/> | <a href="#">Add</a> |
| CHF: <input type="radio"/> Yes <input checked="" type="radio"/> No               | Date: <input type="text"/>                  | <input type="text"/>              | <input type="text"/>              | Delete <input type="checkbox"/> | <a href="#">Add</a> |
| Significant VT/VF: <input type="radio"/> Yes <input checked="" type="radio"/> No | Date: <input type="text"/>                  | <input type="text"/>              | <input type="text"/>              | Delete <input type="checkbox"/> | <a href="#">Add</a> |
| CVA: <input type="radio"/> Yes <input checked="" type="radio"/> No               | Date: <input type="text"/>                  | <input type="text"/>              | <input type="text"/>              | Delete <input type="checkbox"/> | <a href="#">Add</a> |
| Heart Transplant: <input type="radio"/> Yes <input type="radio"/> No             | Date: <input type="text"/>                  | <input type="text"/>              | <input type="text"/>              | Delete <input type="checkbox"/> | <a href="#">Add</a> |
| Death: <input checked="" type="radio"/> Yes <input type="radio"/> No             | Date of occurrence: <input type="text"/>    | <input type="text"/>              | <input type="text"/>              |                                 |                     |
| CV death: <input type="radio"/> Yes <input checked="" type="radio"/> No          |                                             |                                   |                                   |                                 |                     |
| Arry death: <input type="radio"/> Yes <input checked="" type="radio"/> No        |                                             |                                   |                                   |                                 |                     |
| Date last known alive: <input type="text" value="September"/>                    | <input type="text" value="8"/>              | <input type="text" value="2010"/> |                                   |                                 |                     |

### Outcome Description

another MI in April 2003

### Coronary or EP Intervention

|                                                                      | Month                      | Day                  | Year                 |                                 |                     |
|----------------------------------------------------------------------|----------------------------|----------------------|----------------------|---------------------------------|---------------------|
| PCI after MRI: <input type="radio"/> Yes <input type="radio"/> No    | Date: <input type="text"/> | <input type="text"/> | <input type="text"/> | Delete <input type="checkbox"/> | <a href="#">Add</a> |
| CABG after MRI: <input type="radio"/> Yes <input type="radio"/> No   | Date: <input type="text"/> | <input type="text"/> | <input type="text"/> | Delete <input type="checkbox"/> | <a href="#">Add</a> |
| ICD Implantation: <input type="radio"/> Yes <input type="radio"/> No | Date: <input type="text"/> | <input type="text"/> | <input type="text"/> |                                 |                     |
| Pacer Implation <input type="radio"/> Yes <input type="radio"/> No   | Date: <input type="text"/> | <input type="text"/> | <input type="text"/> |                                 |                     |

Revascularization Description:
