# Supplementary material for: The global cardiovascular magnetic resonance registry (GCMR) of the society for cardiovascular magnetic resonance (SCMR): its goals, rationale, data infrastructure, and current developments
Source: Springer Nature journal article supplement (doi:10.1186/s12968-016-0321-7), 2016-12-01

# Additional file 8: Figure S6

## CMR Cooperative web database: Segmental Myocardial Perfusion by CMR



Calendar
Patient Search
Admin
Actions
MRI Details

Welcome Testsite1 User1 - Testsite1 Logout | Settings | About | How to use CMRcoop

---



Choose Patient Patient ID: 2574 Name: Doe, Janice Sex: Female DOB: Jan 01, 1960 MRN: 0000000 Edit

Choose Study MRI Study ID: 3064 MRI Accession #: 1 MRI Date: Jun 28, 2008 Patient Age: 48 yrs

---

- Patient Info
- Cardiac History
- Medications
- Labs and Asso. Tests
- Drugs and Drug Protocols
- MRI Technique
- Resting MRI
- Hemo Response
- Grade Myocardial Segments
- T1 Mapping
- Pericardium and Pleura
- Heart Valves
- Thoracic Aorta
- Non-cardiac Findings
- Complications
- Diagnostic / Therapeutic Decision
- Generate MRI Report

Perfusion
Rest and Stress Dobutamine Function
Stress Function
Viability

Unsaved Changes!
Save

Normal  Abnormal  Possible Subendo  Mild Subendo  Moderate Subendo  Severe Subendo  Possible Transmural  Mild Transmural  Moderate Transmural  Severe Transmural  
 Non-diagnostic  Not Done



Stress Perfusion: Abnormal

17 Normal
16 Normal
Clear All

Not Done
Non-Diag



Rest Perfusion: Normal

17 Normal
16 Normal
Clear All

Not Done
Non-Diag

Save
Generate MRI Report



Supplement: MOESM8 [file 12058944]
