# Supplementary material for: The global cardiovascular magnetic resonance registry (GCMR) of the society for cardiovascular magnetic resonance (SCMR): its goals, rationale, data infrastructure, and current developments
Source: Springer Nature journal article supplement (doi:10.1186/s12968-016-0321-7), 2016-12-01
Supplement: MOESM9 [file 12058944]

# Additional file 9: Figure S7

## CMR Cooperative web database: Segmental Myocardial Viability

CMR Cooperative

Status Panel

---

CMR Coop Database

Patient Info

Cardiac History

Medications

Labs and Asso. Tests

Drugs and Drug Protocols

MRI Technique

Resting MRI

Hemo Response

Grade Myocardial Segments

T1 Mapping

Pericardium and Pleura

Heart Valves

Thoracic Aorta

Non-cardiac Findings

Complications

Diagnostic / Therapeutic Decision

Generate MRI Report

Choose Patient    Patient ID: 585    Name: Doe, John    Sex: Male    DOB: Dec 31, 1968    MRN: 111111111    Edit

Choose Study    MRI Study ID: 607    MRI Accession #: 0    MRI Date: Jan 11, 2005    Patient Age: 36 yrs

Perfusion
Rest and Stress Dobutamine Function
Stress Function
Viability

■ Normal    ■ 1-25    ■ 26-50    ■ 51-75    ■ 76-99    ■ 100  
■ Subsegmental    ■ Diffuse    ■ Epicardial    ■ Midwall    ■ Focal    ■ RV Insertion    ■ Other    ■ Non-diagnostic    ■ Not Done

17 Normal
16 Normal
Clear All
Not Done
Non-Diag
17 Diffuse

MDE LV: Abnormal

MDE consistent with: Myocarditis

Describe MDE pattern:

MDE RV: Not Done

MDE manual volume (ml):

MDE Size

LV Mass By MDE:   (grams)  
 Myo1(total MDE):   (ml)  
 Myo2(coreMDE-MO):   (ml)  
 Myo3(MO):   (ml)

MDE Signal Criteria

MDE total    
 MDE core    
 MDE MO

Save
Generate MRI Report
