# Supplementary material for: The global cardiovascular magnetic resonance registry (GCMR) of the society for cardiovascular magnetic resonance (SCMR): its goals, rationale, data infrastructure, and current developments
Source: Springer Nature journal article supplement (doi:10.1186/s12968-016-0321-7), 2016-12-01
Supplement: MOESM10 [file 12058944]

# Additional file 10: Figure S8

## CMR Cooperative web database: A Sample Cardiac Computed Tomography (CCT) Page



Calendar
Patient Search
Admin
Actions
CT Details

Welcome Testsite1 User1 - Testsite1 Logout | Settings | About | How to use CMRcoop

**Patient Info** Choose Patient Patient ID: 2574 Name: Doe, Janice Sex: Female DOB: Jan 01, 1960 MRN: 0000000 [Edit](#)

**Cardiac History** Choose Study CT Study ID: 19289 CT Accession #: 99999999 CT Date: Aug 12, 2015 Patient Age: 55 yrs

**Medications** CTA

**Lab and Asso. Tests** Clinical Research

**Drugs and Drug Protocols**

**CT Technique**

**Resting CT**

**Hemo Response**

**Grade Myocardial Segments**

**Pericardium and Pleura**

**Coronary Calcium**

**CTA**

**Bypass Graft**

**Thoracic Aorta**

**Non-cardiac Findings**

**Complications**

**Diagnostic / Therapeutic Decision**

**Quality**

**Generate CT Report**

Measurement HR SBP DBP

*Baseline*

During CTA:

At Discharge:

Clinical measurements

All Normal  Clear All

| RCA (worst lesion) | Stenosis                       | Plaque Type                                                             |
|--------------------|--------------------------------|-------------------------------------------------------------------------|
| 1 Prox             | <input type="text" value="0"/> | <input type="radio"/> 1 <input type="radio"/> 2 <input type="radio"/> 3 |
| 2 Mid              | <input type="text" value="0"/> | <input type="radio"/> 1 <input type="radio"/> 2 <input type="radio"/> 3 |
| 3 Distal           | <input type="text" value="0"/> | <input type="radio"/> 1 <input type="radio"/> 2 <input type="radio"/> 3 |
| 4 PDA              | <input type="text" value="0"/> | <input type="radio"/> 1 <input type="radio"/> 2 <input type="radio"/> 3 |
| 16 PLB             | <input type="text" value="0"/> | <input type="radio"/> 1 <input type="radio"/> 2 <input type="radio"/> 3 |

LEFT MAIN-5

| Stenosis    | Plaque Type                                                                                            |
|-------------|--------------------------------------------------------------------------------------------------------|
| 5 Left Main | <input type="text" value="0"/> <input type="radio"/> 1 <input type="radio"/> 2 <input type="radio"/> 3 |

LAD (worst lesion)

| Stenosis  | Plaque Type                                                                                            |
|-----------|--------------------------------------------------------------------------------------------------------|
| 6 Prox    | <input type="text" value="0"/> <input type="radio"/> 1 <input type="radio"/> 2 <input type="radio"/> 3 |
| 7 Mid     | <input type="text" value="0"/> <input type="radio"/> 1 <input type="radio"/> 2 <input type="radio"/> 3 |
| 8 Distal  | <input type="text" value="0"/> <input type="radio"/> 1 <input type="radio"/> 2 <input type="radio"/> 3 |
| 9 Diag 1  | <input type="text" value="0"/> <input type="radio"/> 1 <input type="radio"/> 2 <input type="radio"/> 3 |
| 10 Diag 2 | <input type="text" value="0"/> <input type="radio"/> 1 <input type="radio"/> 2 <input type="radio"/> 3 |

LCX (worst lesion)

| Stenosis  | Plaque Type                                                                                            |
|-----------|--------------------------------------------------------------------------------------------------------|
| 11 Prox   | <input type="text" value="0"/> <input type="radio"/> 1 <input type="radio"/> 2 <input type="radio"/> 3 |
| 12 OM 1   | <input type="text" value="0"/> <input type="radio"/> 1 <input type="radio"/> 2 <input type="radio"/> 3 |
| 13 Distal | <input type="text" value="0"/> <input type="radio"/> 1 <input type="radio"/> 2 <input type="radio"/> 3 |
| 14 OM 2   | <input type="text" value="0"/> <input type="radio"/> 1 <input type="radio"/> 2 <input type="radio"/> 3 |
| 15 PDA    | <input type="text" value="0"/> <input type="radio"/> 1 <input type="radio"/> 2 <input type="radio"/> 3 |
| 17 RAMUS  | <input type="text" value="0"/> <input type="radio"/> 1 <input type="radio"/> 2 <input type="radio"/> 3 |

18 Other    1  2  3

19 Other    1  2  3

[Save](#) [Generate CT Report](#)



Reference Table

| STENOSIS *          | PLAQUE TYPE       |
|---------------------|-------------------|
| 0 = normal          | 1 = Non-calcified |
| 1 = <30%            | 2 = Mixed         |
| 2 = 30-49%          | 3 = Calcified     |
| 3 = 50-69%          |                   |
| 4 = >=70%           |                   |
| 5 = occluded        |                   |
| 6 = stent           |                   |
| 7 = not present     |                   |
| 9 = uninterpretable |                   |
